# Supplementary material
Source: MDPI journal article supplement (https://www.mdpi.com/2414-4088/7/12/113)
Supplement: s1 [file s1]

## Raw data tables:

*Table S1. Client Data (position data)*

| Column               | Format    | Example       |
|----------------------|-----------|---------------|
| ClientId             | Integer   | 2             |
| Data_Pose_Position_x | Float     | 1.21039021    |
| Data_Pose_Position_y | Float     | -2.84206057   |
| Data_Pose_Position_z | Float     | 0.9747523     |
| Data_Pose_Rotation_x | Float     | -0.0830960646 |
| Data_Pose_Rotation_y | Float     | -0.1960247    |
| Data_Pose_Rotation_z | Float     | -0.0672847554 |
| Data_Timestamp       | Timestamp | 1688470587    |

*Table S2. Event Data*

| Column    | Format    | Example    |
|-----------|-----------|------------|
| ClientId  | Integer   | 2          |
| EventType | Integer   | 3          |
| NpcId     | Integer   | 673        |
| Timestamp | Timestamp | 1688470587 |

EventType can contain values ranging from 0 to 8, which are described in Table S3. This list will be updated as new stressors are emulated in the training scenario.

*Table S3. Event Types enumeration*

| Column | Format                   |
|--------|--------------------------|
| 0      | None                     |
| 1      | PulseCheckStarted        |
| 2      | PulseCheckEnded          |
| 3      | GreenTriageCardAssigned  |
| 4      | YellowTriageCardAssigned |
| 5      | RedTriageCardAssigned    |
| 6      | BlackTriageCardAssigned  |

|   |                   |
|---|-------------------|
| 7 | TourniquetApplied |
| 8 | TriageStarted     |

*Table S4. NPC Data*

| Column          | Format               | Example     |
|-----------------|----------------------|-------------|
| NpcId           | Integer              | 673         |
| NpcTracked      | Boolean              | False       |
| Position_x      | Float                | 4.300034    |
| Position_y      | Float                | 0.009000361 |
| Position_z      | Float                | 2.279447    |
| Pulse           | Integer [BPM]        | 90          |
| RespiratoryRate | Integer [per minute] | 18          |
| TriageColor     | Integer              | 2           |

TriageColor can contain values ranging from 0 to 4, which are described in Table Table S3.

*Table S5. Triage Colour enumeration*

| Column | Format |
|--------|--------|
| 0      | None   |
| 1      | Green  |
| 2      | Yellow |
| 3      | Red    |
| 4      | Black  |

*Table S6. Biosignals Data*

| Column       | Format  | Example           |
|--------------|---------|-------------------|
| CardioBanMac | String  | 66:6A:0D:AC:46:E2 |
| ClientId     | Integer | 2                 |

|                               |           |                   |
|-------------------------------|-----------|-------------------|
| Data_Heartrates_Heartrate     | Integer   | 104               |
| Data_Heartrates_TimeStamp     | Timestamp | 1688470587        |
| Data_StressScores_StressScore | Integer   | 32                |
| Data_StressScores_Timestamp   | Timestamp | 1688470587        |
| DeviceId2                     | String    | 00:14:20:0A:10:5J |

*Table S7. Manikin Medical Data*

| Column                                 | Format    | Example                              |
|----------------------------------------|-----------|--------------------------------------|
| uuid                                   | UUID      | c831399d-3819-4b18-95e6-8cdc4d72f0fe |
| SimulatorId                            | String    | Test_client                          |
| Timestamp                              | Timestamp | 1688470587                           |
| MedicalDataDto_heartRate               | Integer   | 80                                   |
| MedicalDataDto_respiratoryRate         | Integer   | 16                                   |
| MedicalDataDto_BloodPressure_Systolic  | Integer   | 120                                  |
| MedicalDataDto_BloodPressure_Diastolic | Integer   | 64                                   |

## Processed data tables:

*Table S8. Training Statistics*

| Column              | Format      | Example      |
|---------------------|-------------|--------------|
| Avg_Triage_Duration | Integer [s] | 25           |
| Max_Triage_Duration | Integer [s] | 35           |
| Min_Triage_Duration | Integer [s] | 15           |
| Total_Triages       | Integer     | 5            |
| Training_Time       | String      | 3 min 23 sec |
| Triage_Accuracy     | Float       | 0.8          |

*Table S9. Identified Stressors*

| Column              | Format    | Example      |
|---------------------|-----------|--------------|
| Anomaly_Confidence  | Float (%) | 24.83        |
| Anomaly_Severity    | Float (%) | 17.48        |
| Begin_Timestamp     | Timestamp | 1688470587   |
| Final_Timestamp     | Timestamp | 1688470597   |
| Stressor            | String    | Client_Speed |
| Stressor_Confidence | Float (%) | 3.89         |
